# Supplementary material for: Hematopoietic Cell-Specific SLC37A2 Deficiency Accelerates Atherosclerosis in LDL Receptor-Deficient Mice
Source: PubMed Central journal article supplement (PMC8702732; doi:10.3389/fcvm.2021.777098), 2021-12-10
Supplement: Data_Sheet_1.pdf [file Data_Sheet_1.pdf]

## **Hematopoietic cell-specific SLC37A2 deficiency accelerates atherosclerosis in LDL receptor-deficient mice**

Qingxia Zhao <sup>1,†</sup>, Zhan Wang <sup>1,†</sup>, Allison K. Meyers <sup>2</sup>, Jennifer Madenspacher <sup>3</sup>, Manal Zabalawi <sup>1</sup>, Qianyi Zhang <sup>4</sup>, Elena Boudyguina <sup>1</sup>, Fang-Chi Hsu <sup>5</sup>, Charles E. McCall <sup>1,2</sup>, Cristina M. Furduliu <sup>1</sup>, John S. Parks <sup>1</sup>, Michael B. Fessler <sup>3</sup>, Xuewei Zhu <sup>1,2,\*</sup>

<sup>1</sup>. Department of Internal Medicine, Section on Molecular Medicine, Wake Forest School of Medicine, Winston-Salem, NC 27157, USA

<sup>2</sup>. Department of Microbiology and Immunology, Wake Forest School of Medicine, Winston-Salem, NC 27157, USA

<sup>3</sup>. Immunity, Inflammation and Disease Laboratory, National Institute of Environmental Health Sciences, NIH, Research Triangle Park, NC 27709, USA

<sup>4</sup>. Department of Biology, Wake Forest University, Winston-Salem, NC 27109, USA

<sup>5</sup>. Department of Biostatistics and Data Science, Wake Forest School of Medicine, Winston-Salem, NC 27157, USA

† These authors contributed equally to this work.

\* Correspondence: Dr. Xuewei Zhu, Department of Internal Medicine, Section on Molecular Medicine, Wake Forest School of Medicine, Medical Center Blvd, Winston-Salem, NC 27157, USA; Phone: 336-713-1445; Fax: 336-716-6279; Email: [xwzhu@wakehealth.edu](mailto:xwzhu@wakehealth.edu)

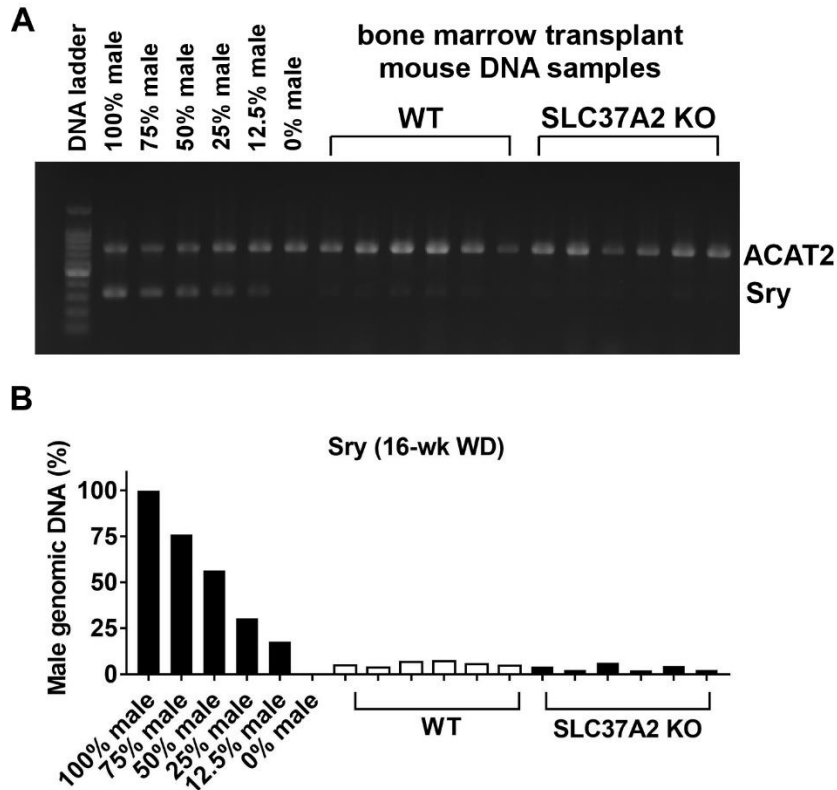

**Figure S1. The efficiency of circulating hematopoietic cell replacement after bone marrow transplantation.**

Sixteen wks after diet feeding, genomic DNA was isolated from whole blood. Fragments of the male Sry gene and ACAT2 (control) genes were amplified by PCR using genomic DNA as a template.

(A) A series of male and female genomic DNA mixtures were amplified to construct a standard curve based on the quantified ratio of Sry/ACAT2 band density and the actual percentage of the male/female genomic DNA mixture.

(B) Percentage of blood leukocyte female genomic DNA in male recipient mice was calculated based on the standard curve.

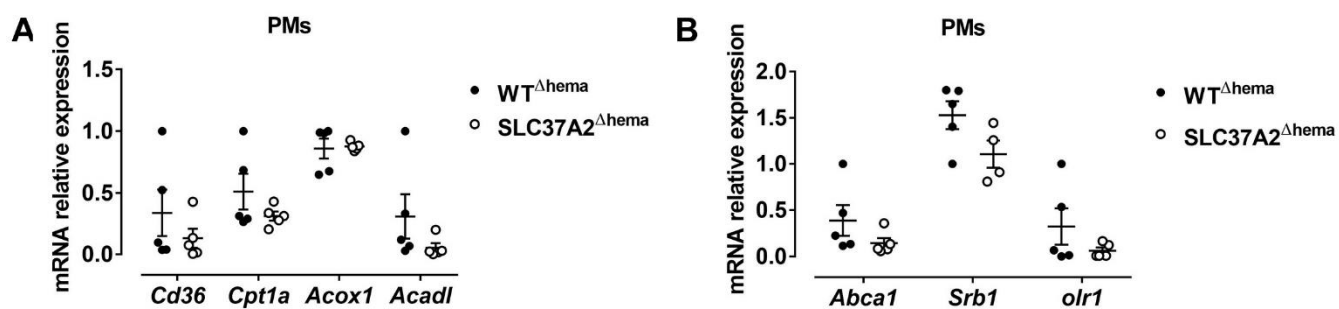

**Figure S2. SLC37A2 deletion does not affect lipid metabolism-related gene expression in resident peritoneal macrophages from diet-fed mice.**

(A-B) Relative transcript levels for genes encoding lipid metabolism in resident peritoneal macrophages. Each symbol represents an individual mouse. Data are expressed as mean  $\pm$  SEM.

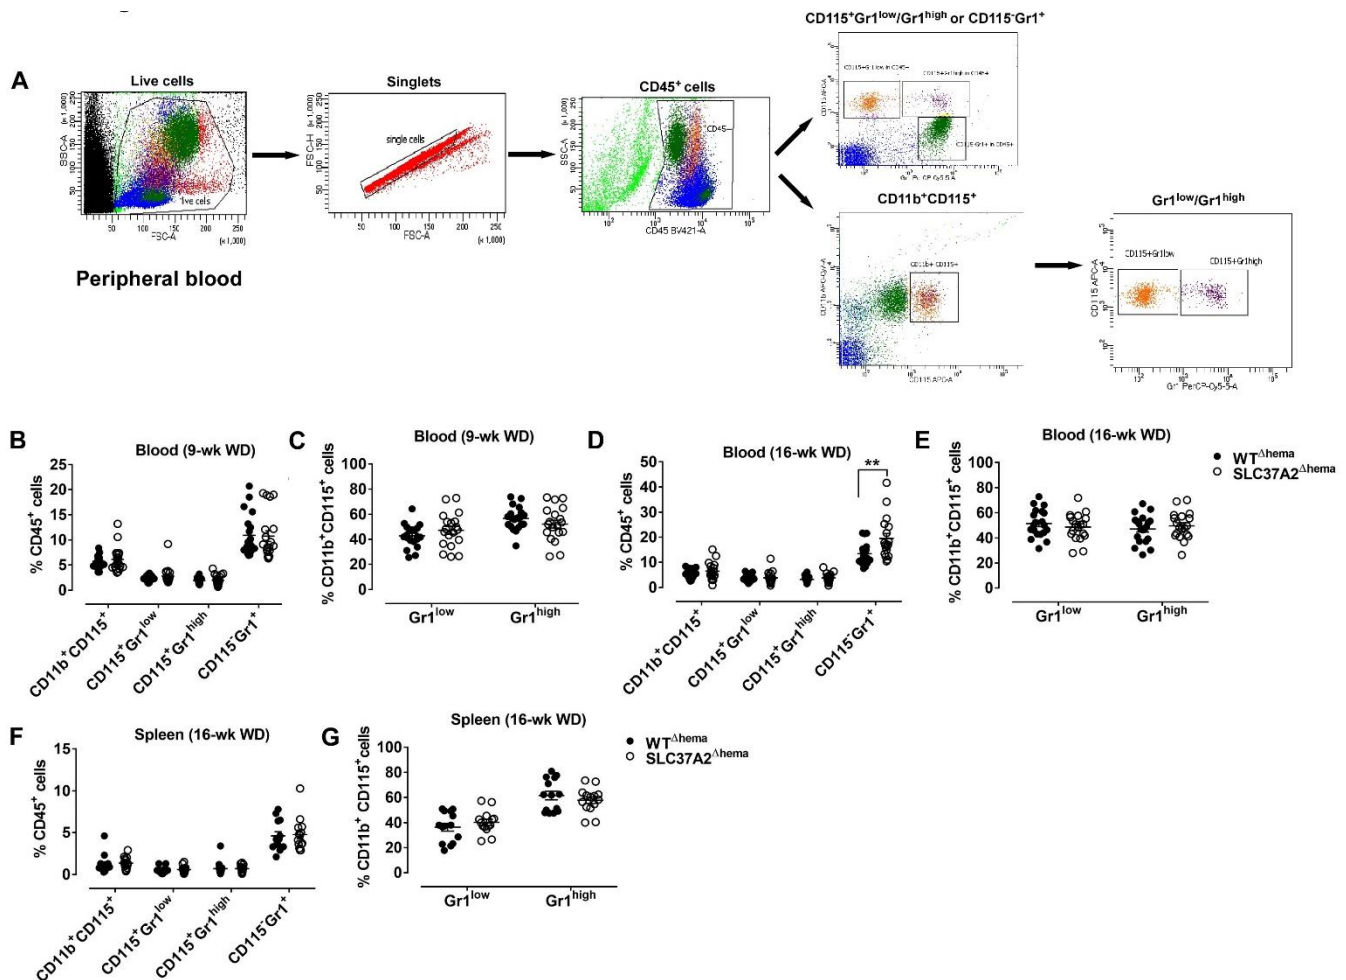

**Figure S3. Hematopoietic SLC37A2 deletion has a minor effect on blood or spleen myeloid cell composition after 16-wks of diet feeding.**

Irradiated *Ldlr*<sup>-/-</sup> mice transplanted with WT or SLC37A2KO bone marrow were fed a high-fat western diet for 16 wks. Blood cells and spleen cells were stained with CD11b-PE, CD115-APC, Gr1 (Ly6C/Ly6G)-PerCP-Cy5.5, and CD45-V450 and analyzed by flow cytometry.

(A) Gating strategies of the flow cytometry analysis for peripheral blood cells. Similar gating strategies were used to analyze the splenocytes.

(B-C) Percentages of monocytes (CD11b<sup>+</sup>CD115<sup>+</sup>), Gr1<sup>low</sup> (CD11b<sup>+</sup>CD115<sup>+</sup>Gr1<sup>low</sup>), Gr1<sup>high</sup> (CD11b<sup>+</sup>CD115<sup>+</sup>Gr1<sup>high</sup>), and neutrophils (CD11b<sup>+</sup>CD115<sup>+</sup>Ly6G<sup>+</sup>) in circulating blood CD45<sup>+</sup> cell (B) or blood monocytes (C) after 9-wk diet feeding.

(D-E) Percentages of monocytes (CD11b<sup>+</sup>CD115<sup>+</sup>), Gr1<sup>low</sup> (CD11b<sup>+</sup>CD115<sup>+</sup>Gr1<sup>low</sup>), Gr1<sup>high</sup> (CD11b<sup>+</sup>CD115<sup>+</sup>Gr1<sup>high</sup>), and neutrophils (CD11b<sup>+</sup>CD115<sup>+</sup>Ly6G<sup>+</sup>) in circulating blood CD45<sup>+</sup> cell (D) or blood monocytes (E) after 16-wk diet feeding.

(F-G) Percentages of monocytes (CD11b<sup>+</sup>CD115<sup>+</sup>), Gr1<sup>low</sup> (CD11b<sup>+</sup>CD115<sup>+</sup>Gr1<sup>low</sup>), Gr1<sup>high</sup> (CD11b<sup>+</sup>CD115<sup>+</sup>Gr1<sup>high</sup>), and neutrophils (CD11b<sup>+</sup>CD115<sup>+</sup>Ly6G<sup>+</sup>) in splenic CD45<sup>+</sup> cell (F) or monocytes (G) after 16-wk diet feeding.

Data are expressed as mean ± SEM. n = 12-16 mice per genotype. \*\* P<0.01, unpaired, two-tailed Student's t-test. Each symbol represents an individual mouse.

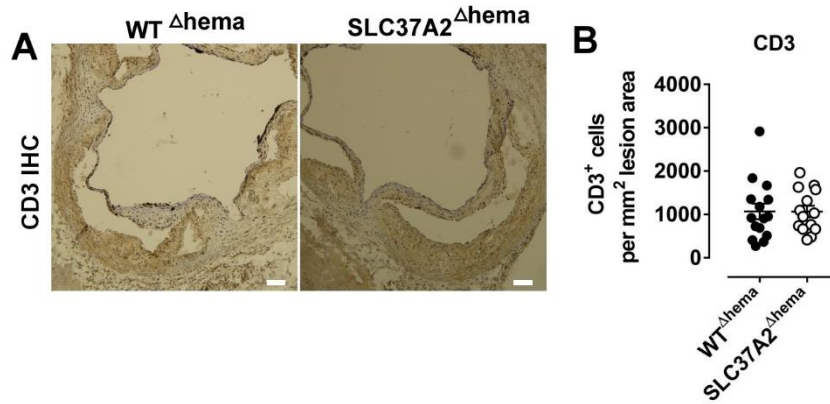

**Figure S4. Hematopoietic SLC37A2 deletion does not alter CD3<sup>+</sup> cell (T cell) content in the aortic root intimal area.**

(A-B) Quantification of CD3<sup>+</sup> cells (T cells) in the aortic root intimal area (number of CD3 positive cells in lesion). Scale bars = 100  $\mu$ m.

Data are expressed as mean  $\pm$  SEM. Each symbol represents an individual mouse. n = 12-16 mice per genotype. Unpaired, two-tailed Student's t-test.

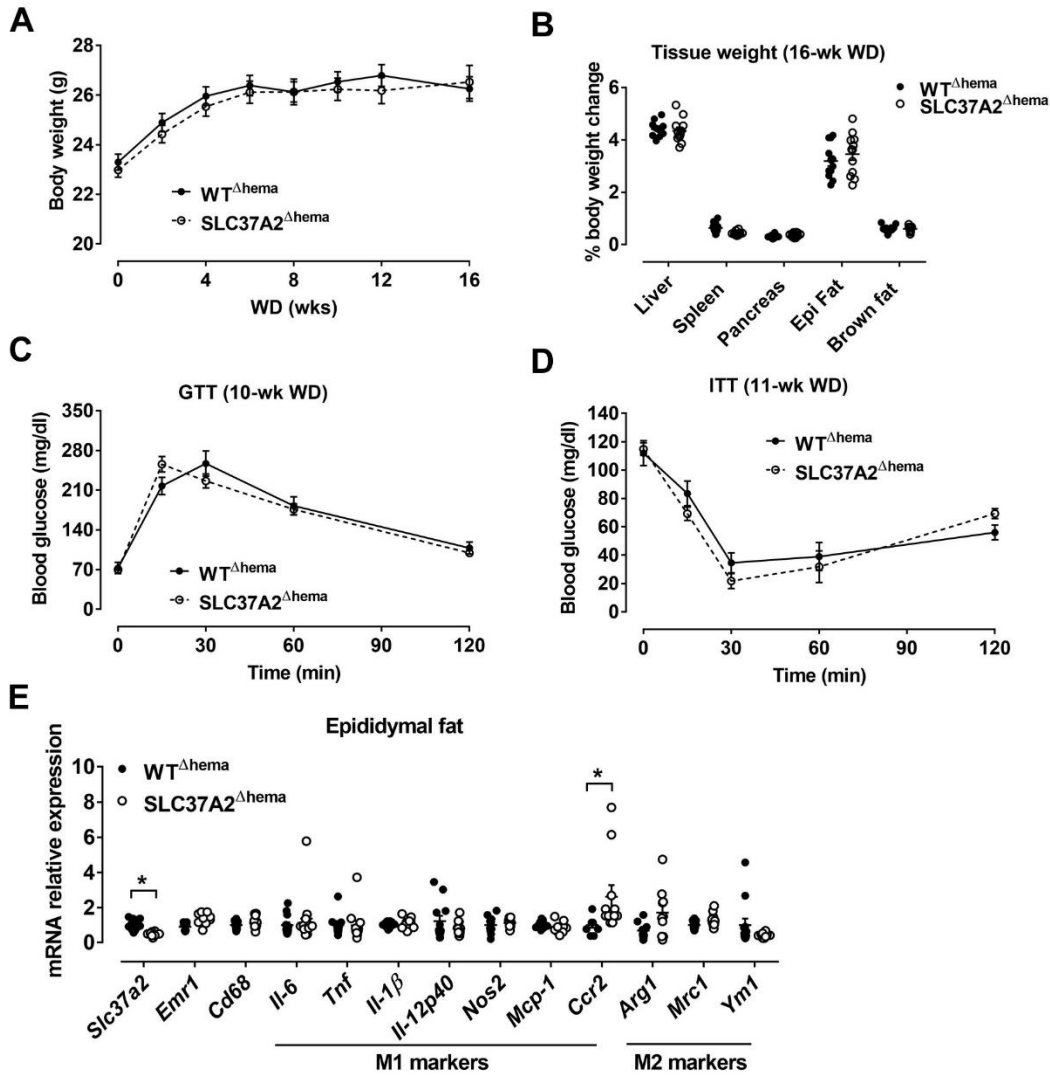

**Figure S5. Hematopoietic SLC37A2 deletion has minimal impact on insulin resistance and adipose inflammation under pro-atherogenic conditions.**

Irradiated *Ldlr*<sup>-/-</sup> mice receiving bone marrow from WT or SLC37A2KO mice were fed a high-fat western diet for 16 wks.

(A) Mouse body weight over the 16-wk diet feeding period.

(B) Mouse tissue weight after 16-wk diet feeding.

(C) GTTs were performed after 10-wk diet feeding.

(D) ITTs were performed after 11-wk diet feeding.

(E) Relative transcript levels of genes in epididymal fat from 16-wk diet-fed mice.

Data are expressed as mean  $\pm$  SEM.  $n = 12-16$  mice per genotype. \*  $P < 0.05$ , unpaired, two-tailed Student's t-test. Each symbol represents an individual mouse.

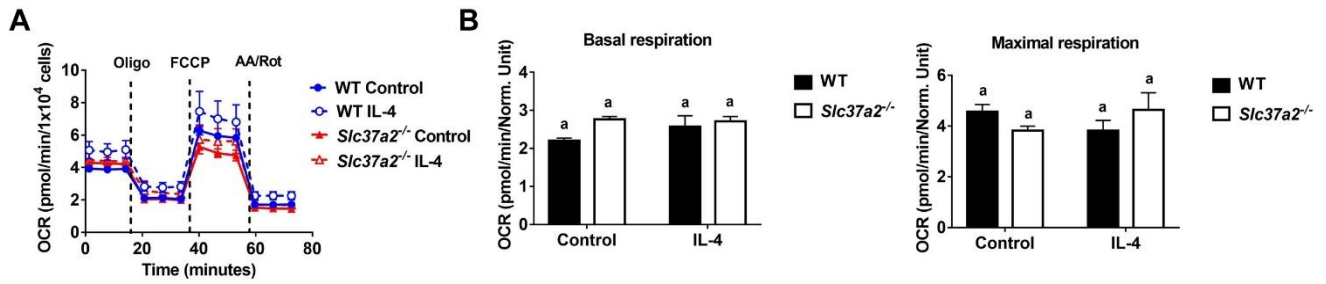

**Figure S6. SLC37A2 deficiency does not affect macrophage mitochondrial respiration after 6 h of IL-4 treatment.**

(A-B) Seahorse analysis of oxygen consumption rate (OCR) in WT and *Slc37a2*<sup>-/-</sup> BMDMs treated with or without 20 ng/ml IL-4 for 6 h.

Data are expressed as mean ± SEM. Bars with different letters denote significant among groups ( $P < 0.05$ ); two-way ANOVA with post hoc Tukey's multiple comparisons test.

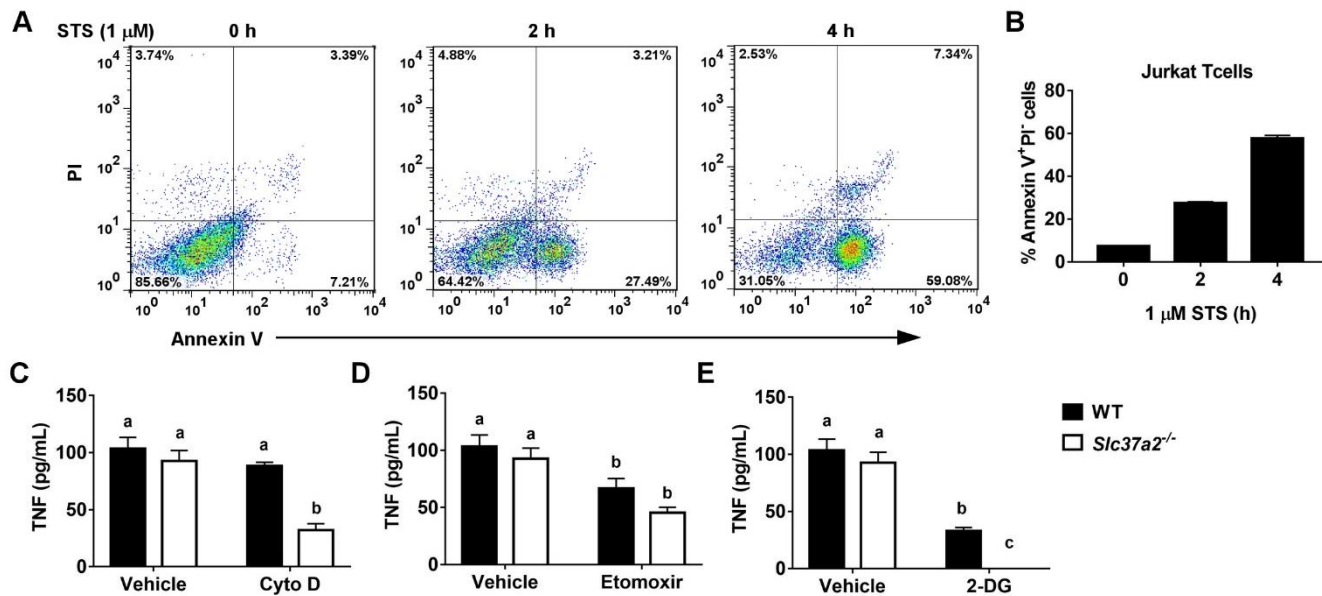

**Figure S7. Flow cytometry analysis of apoptotic Jurkat T cells.**

(A-B) Jurkat T cells were stimulated with 1  $\mu$ M staurosporine for 0-4 h before stained with Annexin V-APC and PI. The percentage of early (Annexin V<sup>+</sup>PI<sup>-</sup>) and late apoptotic (Annexin V<sup>+</sup>PI<sup>+</sup>) cells was quantified by flow cytometry analysis. The numbers indicate percentages of the subpopulations (A). The percentage of early apoptotic cells during a 4-h period of staurosporine treatment (B).

(C-E) TNF secretion from WT and *Slc37a2*<sup>-/-</sup> BMDMs pretreated with phagocytosis inhibitor cytochalasin D (Cyto D, 10  $\mu$ M), fatty acid oxidation inhibitor etomoxir (100  $\mu$ M), and hexokinase inhibitor 2-deoxy-D-glucose (2-DG; 10 mM) for 30 min, followed by co-culture with ACs (macrophages: ACs= 1:5) for 4 h. Data are expressed as mean  $\pm$  SEM. Bars with different letters differ significantly ( $P < 0.05$ ); two-way ANOVA with post hoc Tukey's multiple comparisons test.



**Table S1. Forward and reverse primers used in qPCR**

| <b>Gene name</b> | <b>Forward primer (5'→3')</b> | <b>Reverse primer (5'→3')</b> |
|------------------|-------------------------------|-------------------------------|
| Abca1            | CGTTTCCGGGAAGTGTCTTA          | GCTAGAGATGACAAGGAGGATGGA      |
| Abcg1            | GTT CAG GAG GCC ATG ATG GT    | CCG TCT GCC TTC ATC CTT CTC   |
| Acadl            | TCTTTTCCTCGGAGCATGACA         | GACCTCTCTACTCACTTCTCCAG       |
| Acox1            | AGATTGGTAGAAATTGCTGCAAAA      | ACGCCACTTCCTTGCTCTTC          |
| Arg1             | AGCACTGAGGAAAGCTGGTC          | CAGACCGTGGGTTCTTCACA          |
| Ccr2             | GTGTACATAGCAACAAGCCTCAAAG     | CCCCACATAGGGATCATGA           |
| Cd36             | GAGGAATCAGATGAGGATATGGGA      | AAGCAGGCTGACTTGGTTGC          |
| Cd68             | CTTCCCACAGGCAGCACAG           | AATGATGAGAGGCAGCAAGAGG        |
| Cpt1a            | CACCAACGGGCTCATCTTCTA         | CAAATGACCTAGCCTTCTATCGAA      |
| Emr1             | CTTTGGCTATGGGCTTCCAGTC        | GCAAGGAGGACAGAGTTTATCGTG      |
| Fasn             | GCTGCGGAAACTTCAGGAAAT         | AGAGACGTGTCACTCCTGGACTT       |
| Gapdh            | TGTGTCCGTCGTGGATCTGA          | CCTGCTTACCACCTTCTTGAT         |
| Hmgcr            | CTTGTGGAATGCCTTGTGATTG        | AGCCGAAGCAGCACATGAT           |
| Hmgcs            | GCCGTGAACTGGGTGCGAA           | GCATATATAGCAATGTCTCCTGCAA     |
| Il-1 $\beta$     | GTCACAAGAAACCATGGCACAT        | GCCCATCAGAGGCAAGGA            |
| Il-6             | CTGCAAGAGACTTCCATCCAGTT       | AGGGAAGGCCGTGGTTGT            |
| Il-10            | CAGAGCCACATGCTCCTAGA          | TGTCCAGCTGGTCCTTTGTT          |
| Il-12p40         | AGACCCTGCCATTGAACTG           | GAAGCTGCTGCTGTTCTCATATT       |
| Mcp-1            | TTC CTCCACCACCATGCAG          | CCAGCCGGCAACTGTGA             |
| Mrc1             | ACGAGCAGGTGCAGTTTACA          | ACATCCCATAAGCCACCTGC          |
| Olr1             | CAAGATGAAGCCTGCGAATGA         | ACCTGGCGTAATTGTGTCCAC         |
| Pparc1a          | AACCACACCCACAGGATCAGA         | TCTTCGCTTTATTGCTCCATGA        |
| Pparc1b          | CGCTCCAGGAGACTGAATCCAG        | CTTGACTACTGTCTGTGAGGC         |
| Ppard            | ACGCACCCTTTGTCATCCA           | TTCCACACCAGGCCCTTCT           |
| Pparg            | CACAATGCCATCAGGTTTGG          | GCTGGTCGATATCACTGGAGATC       |
| Scd1             | CCGGAGACCCCTTAGATCGA          | TAGCCTGTAAAAGATTTCTGCAAACC    |
| Slc37a2          | GCCTGCGGCAGAAGCAGTGG          | AGCAGGGGTGGCCCATGTTG          |
| Srb1             | TCCCCATGAACTGTTCTGTGAA        | TGCCCGATGCCCTTGA              |
| Srebp1c          | GGAGCCATGGATTGCACATT          | GGCCCGGAAGTCACTGT             |
| Srebp2           | GCGTTCTGGAGACCATGGA           | ACAAAGTTGCTCTGAAAACAAATCA     |
| Tnf              | GGCTGCCCCGACTACGT             | ACTTTCTCCTGGTATGAGATAGCAAAT   |
| Ym1              | AAGAACACTGAGCTAAAACTCTCCT     | GAGACCATGGCACTGAACG           |
